# Supplementary material for: Lamivudine versus Entecavir for Newly Diagnosed Hepatitis B Virus-Related Hepatocellular Carcinoma
Source: PubMed Central journal article supplement — Gut Liver. 2016 Jun 13;10(6):939–47. doi: 10.5009/gnl15527 (PMC5087934; doi:10.5009/gnl15527), 2016-06-13
Supplement: gnl-10-939_suppl.1.pdf [file gnl-10-939_suppl.1.pdf]

**Supplementary Table 1.** Comparison between Lamivudine and Entecavir according to the Subgroup

| Subgroup                      | Patients no. | Survival rate, %<br>(entecavir vs lamivudine) |              | p-value |
|-------------------------------|--------------|-----------------------------------------------|--------------|---------|
|                               |              | 1-Year                                        | 5-Years      |         |
| All                           | 249 vs 202   | 65.4 vs 59.4                                  | 46.1 vs 33.1 | 0.002   |
| mUICC stage I/II              | 122 vs 94    | 83.6 vs 81.9                                  | 70.4 vs 54.2 | 0.007   |
| mUICC stage III/IV            | 127 vs 108   | 48.8 vs 37.9                                  | 22.8 vs 14.8 | 0.054   |
| HBV DNA <20,000 IU/mL         | 45 vs 49     | 62.2 vs 48.0                                  | 48.8 vs 40.0 | 0.23    |
| HBV DNA ≥20,000 IU/mL         | 204 vs 153   | 66.1 vs 63.1                                  | 45.5 vs 30.9 | 0.004   |
| Child-Pugh class A            | 200 vs 145   | 73.0 vs 51.5                                  | 64.8 vs 38.6 | 0.004   |
| Child-Pugh class B/C          | 49 vs 57     | 34.6 vs 42.1                                  | 24.4 vs 19.3 | 0.99    |
| Previous decompensation (no)  | 174 vs 144   | 79.8 vs 72.2                                  | 59.2 vs 40.2 | <0.001  |
| Previous decompensation (yes) | 75 vs 58     | 32.0 vs 24.1                                  | 16.0 vs 15.5 | 0.559   |
| CVR within year               | 94 vs 33     | 90.5 vs 84.8                                  | 72.6 vs 39.4 | <0.001  |
| CVR during follow-up          | 139 vs 92    | 92.8 vs 90.2                                  | 79.9 vs 60.9 | <0.001  |
| No CVR during follow-up       | 53 vs 46     | 49.1 vs 60.9                                  | 5.7 vs 17.4  | 0.033   |
| No evaluation of CVR          | 57 vs 64     | 14.0 vs 10.9                                  | 1.8 vs 4.7   | 0.95    |
| Curative therapy              | 110 vs 67    | 94.5 vs 92.5                                  | 83.6 vs 65.6 | 0.004   |
| Palliative therapy            | 139 vs 135   | 42.4 vs 42.9                                  | 16.5 vs 17.0 | 0.73    |
| Mortality <a year             | 86 vs 84     | 4.0 vs 3.8*                                   | -            | 0.95    |
| Mortality ≥a year             | 163 vs 118   | -                                             | 70.5 vs 56.7 | 0.004   |

mUICC, modified Union for International Cancer Control; HBV, hepatitis B virus; CVR, complete virological response.

\*Median survival duration (mo); all deaths occurred within 1 year.
