# Supplementary material for: Lamivudine versus Entecavir for Newly Diagnosed Hepatitis B Virus-Related Hepatocellular Carcinoma
Source: PubMed Central journal article supplement — Gut Liver. 2016 Jun 13;10(6):939–47. doi: 10.5009/gnl15527 (PMC5087934; doi:10.5009/gnl15527), 2016-06-13
Supplement: gnl-10-939_suppl.2.pdf [file gnl-10-939_suppl.2.pdf]

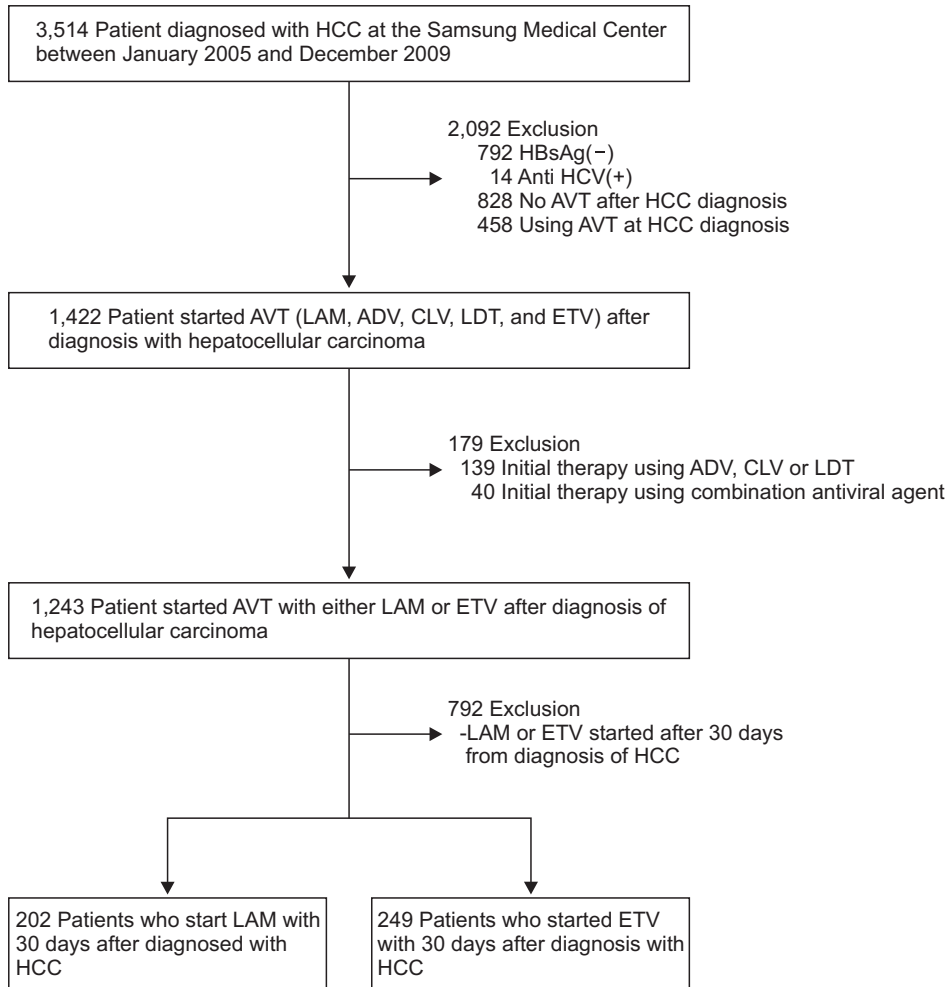

**Supplementary Fig. 1.** Patient flow diagram.

HCC, hepatocellular carcinoma; HCV, hepatitis C virus; AVT, antiviral therapy; LAM, lamivudine; ADV, adefovir; CLV, clevudine; LDT, telbivudine; ETV, entecavir.
